# 1 **A validated cloud-based genomic platform for co-ordinated, expedient** 2 **global analysis of SARS-CoV-2 genomic epidemiology**

## 3 **Authors**

4 Daniel Amoako,<sup>1</sup> Nguyen To Anh,<sup>2</sup> Jasmine Bastable,<sup>3</sup> Marc Brouard,<sup>4</sup> Constanza Campano  
5 Romero,<sup>5</sup> Andres Castillo Ramirez,<sup>5</sup> Bede Constantinides,<sup>4</sup> Derrick W. Crook,<sup>3,4</sup> Phan  
6 Manh Cuong,<sup>6</sup> Moussa Moise Diagne,<sup>7</sup> Amadou Diallo,<sup>7</sup> Nguyen Thanh Dung,<sup>8</sup> Laura  
7 Dunn,<sup>3</sup> Le Van Duyet,<sup>6</sup> Josie Everatt,<sup>1</sup> Katherine Fletcher,<sup>4</sup> Philip W. Fowler,<sup>4</sup> Mailie Gail,<sup>9</sup>  
8 Jessica Gentry,<sup>3</sup> Saheer Gharbia,<sup>10</sup> Hospital for Tropical Diseases SARS-CoV-2 testing  
9 team,<sup>8</sup> Nguyen Thi Thu Hong,<sup>2</sup> Martin Hunt,<sup>4,12</sup> Zam Iqbal,<sup>4,12</sup> Katie Jeffery,<sup>3</sup> Dikeledi  
10 Kekana,<sup>1</sup> Thomas Kesteman,<sup>2</sup> Jeff Knaggs,<sup>4,12</sup> Marcela Lopes Alves,<sup>4</sup> Dinh Nguyen Huy  
11 Man,<sup>8</sup> Amy J. Mathers,<sup>11</sup> Nghiem My Ngoc,<sup>8</sup> Sarah Oakley,<sup>3</sup> Hardik Parikh,<sup>11</sup> Tim E.A.  
12 Peto,<sup>3,4</sup> Phuong Quan,<sup>4</sup> Marcelo Rojas Herrera,<sup>5</sup> Nicholas Sanderson,<sup>4</sup> Vitali Sintchenko,<sup>9</sup>  
13 Jeremy Swann,<sup>4</sup> Junko Takata,<sup>3,4</sup> Nguyen Thi Tam,<sup>2</sup> Le Van Tan,<sup>2</sup> Pham Ngoc Thach,<sup>6</sup>  
14 Ndeye Marieme Top,<sup>7</sup> Nguyen Thu Trang,<sup>2</sup> Van Dinh Trang,<sup>6</sup> Robert Turner,<sup>4</sup> H. Rogier  
15 van Doorn,<sup>2</sup> Anne von Gottberg,<sup>1,13</sup> Jeremy Westhead,<sup>4</sup> Nicole Wolter,<sup>1,13</sup> Bernadette C.  
16 Young<sup>3,4</sup>

## 18 **Author Affiliations**

- 19 1. The National Institute for Communicable Diseases (NICD), a division of the  
20 National Health Laboratory Service, Johannesburg, Republic of South Africa
- 21 2. Oxford University Clinical Research Unit, Ho Chi Minh City, Vietnam.
- 22 3. Oxford University Hospitals NHS Foundation Trust, Oxford, United Kingdom
- 23 4. Nuffield Department of Medicine, University of Oxford, Oxford, United Kingdom
- 24 5. El Instituto de Salud Pública de Chile, Santiago, Chile

**NOTE: This preprint reports new research that has not been certified by peer review and should not be used to guide clinical practice.**

- 25 6. National Hospital for Tropical Diseases, Hanoi, Vietnam
- 26 7. The Institut Pasteur de Dakar, Dakar, Senegal
- 27 8. Hospital for Tropical Diseases, Ho Chi Minh City, Vietnam
- 28 9. Microbial Genomics Reference Laboratory, Institute of Clinical Pathology and
- 29 Medical Research, New South Wales Health Pathology, Sydney, Australia
- 30 10. Genomic Surveillance Unit, The Wellcome Sanger Institute, Hinxton, United
- 31 Kingdom
- 32 11. Division of Infectious Diseases, School of Medicine, University of Virginia,
- 33 Charlottesville, United States of America
- 34 12. European Bioinformatics Institute, Hinxton, United Kingdom
- 35 13. Faculty of Health Sciences, University of the Witwatersrand, Johannesburg, South
- 36 Africa

37

38 **Corresponding author:** Bernadette Young ([bernadette.young@ndm.ox.ac.uk](mailto:bernadette.young@ndm.ox.ac.uk)), Nuffield

39 Department of Medicine, University of Oxford, Oxford, OX3 9DU, 01865 220856.

40

41 **Running title:** Coordinated cloud-based genome analysis for SARS-CoV-2

42

43 **Keywords:** COVID-19, SARS-CoV-2, public health genomics, bioinformatics

44

45 **Article Summary Line:** A cross-sectional study of SARS-CoV-2 sequencing demonstrates

46 that cloud-based sequencing analysis has the power to relieve bioinformatic bottlenecks,

47 and facilitate collaboration in pathogen surveillance to enhance pandemic preparedness.

## 48 **Abstract**

### 49 **Background**

50 Viral sequencing has made critical contributions to our understanding of and response to  
51 the COVID-19 pandemic, but sequencing capacity and bioinformatic expertise remain  
52 limited in many settings. This proof-of-principle study aimed to demonstrate the utility  
53 of a cloud-based sequencing analysis pipeline, the Tiled Amplicon Pipeline (TAP), for  
54 rapid and collaborative SARS-CoV-2 sequencing across seven globally distributed sites.

55

### 56 **Methods**

57 In this cross-sectional study from July to August 2022, seven sites submitted all SARS-  
58 CoV-2 sequence data generated over a two-week period to our cloud platform. No patient  
59 identifying information was uploaded, and human reads were removed prior to upload  
60 to the cloud. Users could opt in to share sample information with collaborators via a  
61 tagging system. The pipeline performed sequence assembly, lineage identification and  
62 relatedness analysis.

63

### 64 **Results**

65 Seven sites contributed 5,432 sequences, of which 5,342 (98.3%) were from clinical  
66 samples and 90 (1.7%) were controls. Of the clinical samples that were correctly  
67 assembled, 3,439/4,179 (82.3%) had sufficient coverage for lineage assignment.  
68 Omicron lineages dominated, with BA.5, BA.4 and BA.2 comprising the vast majority,  
69 consistent with contemporary epidemiological observations at the time. Phylogenetic  
70 analysis demonstrated low diversity within lineages, and genotypically identical or highly  
71 similar sequences were recovered from globally disparate sites.

72

73 **Conclusions**

74 A cloud-based analysis platform like TAP addresses bioinformatic bottlenecks and  
75 facilitates collaboration in pathogen surveillance, enhancing epidemic and pandemic  
76 preparedness.

## 77 **Introduction**

78 Viral genome sequencing has proven pivotal to understanding the evolution of the SARS-  
79 CoV-2 virus during the COVID-19 pandemic and in shaping the public health response.  
80 International genomic surveillance and data sharing initiatives have together made it  
81 possible to track the emergence of variants globally [1], to demonstrate the impact of  
82 travel restrictions on viral dynamics across continents [2] or within countries [3, 4], and  
83 to identify transmission routes within hospitals [5]. Successive waves of infection driven  
84 by new variants showed that rapidly detecting new lineages is critical for understanding  
85 disease epidemiology and guiding subsequent public health responses [6], as well as  
86 informing the development of vaccines and therapeutics such as neutralising antibodies  
87 [7-9].

88  
89 However, the pandemic also highlighted marked global variability in sequencing capacity  
90 and cost [10], with much of the SARS-CoV-2 sequencing undertaken at centralised  
91 reference laboratories [11]. Several important challenges remain in expanding genomic  
92 surveillance, including access to sequencing technology, availability of bioinformatic  
93 expertise, and interpretability of results generated using a plethora of different wet lab  
94 and bioinformatics protocols [12-14]. There is a need for accessible genomic surveillance  
95 infrastructure that can be used by researchers and clinicians from any location, to deliver  
96 an up-to-date global perspective of viral evolution.

97  
98 One solution to both the shortage of bioinformatic expertise and the lack of global  
99 interpretability of results is web-accessible analysis infrastructure [15]. The Global  
100 Pathogen Analysis Service (GPAS) was rapidly set up in 2021 in response to the COVID-  
101 19 pandemic by the University of Oxford as a cloud-based, globally accessible web

102 platform. GPAS provided fast and secure access to a comprehensive SARS-CoV-2 genomic  
103 analysis pipeline, delivering genome assembly, variant calling and lineage classification  
104 from raw sequence data. Users retained control of their data but could opt in to share  
105 their data to facilitate comparisons in a wider context, empowering laboratories to  
106 control their own analysis. GPAS was validated to UKAS ISO 15189:2012 standards in a  
107 UK tertiary hospital clinical microbiology laboratory, and was commissioned by the UK  
108 Health Security Agency for over a year to support Pillar 1 national surveillance and  
109 various clinical trials. GPAS provided proof-of-principle that standard microbiology  
110 laboratories without bioinformatics expertise can generate outputs for local surveillance  
111 and automatically submit sequences to public repositories.

112

113 In 2024, GPAS was upgraded as the Tiled Amplicon Pipeline (TAP) with major  
114 enhancements to several software components. Since January 2025 TAP has been  
115 deployed as the SARS-CoV-2 pipeline on EIT Pathogena (version 1.2.0), a multi-pipeline  
116 genomic pathogen analysis platform that is free of charge for users in low- and middle-  
117 income countries and accessible in all settings with internet access [16]. This service  
118 demonstrates the potential of cloud-based platforms to overcome barriers to  
119 democratising effective genomic surveillance, making advanced genomic analysis  
120 available to resource-limited laboratories.

121

122 In this paper, we report the results of a collaborative, cross-sectional SARS-CoV-2  
123 sequencing study across seven globally distributed sites, which demonstrate the utility  
124 of a cloud-based sequencing platform in providing a quality assured, rapid, and  
125 integrated global snapshot of viral diversity. We further describe the components of the

126 pipeline and discuss its potential for rapid adaptation in response to future viral

127 pandemics.

128

## 129 **Methods**

### 130 **Pipeline development**

131 TAP was deployed to a cloud platform and controlled via a Command Line Interface (CLI)  
132 tool. Full methodology is described in the Appendix (Supplementary Appendix A). At  
133 upload, a universally unique identifier (UUID) is generated and assigned to each sample.  
134 The mapping between the UUID and the user's sample identifier is downloaded and only  
135 held by the user, and FASTQ header lines are also truncated, ensuring that no potentially  
136 personally identifiable information is transmitted to the cloud platform. Tight access  
137 control to data applies within TAP, and by default data is not shared with other users  
138 unless explicitly authorised by the data owners.

139  
140 Following FASTQ file upload to the cloud, processing commences automatically with no  
141 further user input required. Any reads mapping to the human genome are first removed  
142 [17], reducing the risk of any human reads being retained. Genome assembly is  
143 performed by an amplicon-aware genome assembly tool Viridian v1.3.1 [18], which  
144 scaffolds per-amplicon *de novo* assemblies into a single whole genome consensus  
145 assembly in FASTA format. Viridian was configured to use the SARS-CoV-2 reference  
146 genome Wuhan-Hu-1 (MN908947.3) for assembly and variant calling [19], and a library  
147 of seven amplicon primer schemes (AmpliSeq v1; ARTIC versions 3, 4.1, 5.3.2 (400), 5.2.0  
148 (1200); Midnight 1200; VarSkip v1a-2b). When a primer scheme is not specified by the  
149 user, Viridan can automatically infer the most likely primer scheme from within its  
150 library.

151  
152 After assembly, amino acid mutations are identified using Nextclade [20], and Pango  
153 lineages are assigned with Pangolin version 4.3.1 [21]. Aligned sequences are compared



154 using a novel algorithm, FindNeighbour5, which identifies single nucleotide variant  
155 (SNV) distances between sequences without conflicting variant calls (0 SNVs) as well as  
156 those differing by one, two and three SNVs [22, 23]. The main outputs from the pipeline  
157 are presented in an access-restricted user interface portal and downloadable as a  
158 summary file containing the lineage assignment, a list of related samples (according to  
159 permissions), and metrics of the genome assembly (e.g. coverage, mean depth, amplicon  
160 dropouts, etc). Detailed intermediate files such as VCF or FASTA files are also available  
161 for download.

162

### 163 **Pipeline validation**

164 GPAS was validated for both Illumina and Oxford Nanopore Technologies (ONT)  
165 sequencing platforms in 2021, using various datasets including a ‘truth set’ of cultured  
166 SARS-CoV-2 samples sequenced with multiple platforms and library preparations,  
167 annotated with manually curated variant calls (described in further detail in [18] and  
168 [24]), in addition to community samples collected in Northumbria, UK. Overall, GPAS  
169 showed negligible adjusted false call rates (less than 1/100,000 nucleotides) with respect  
170 to the ‘truth set’, and had high concordance (less than 1.9/1,000,000 discordant events)  
171 with the ARTIC assembly pipeline in use at the time.

172

173 TAP was subsequently validated against the same ‘truth set’ of cultured SARS-CoV-2  
174 samples, which achieved 100% concordance with expected Pango lineages using the  
175 same Pangolin version. Concordance of TAP and GPAS was further compared using data  
176 from the current study, which showed 99.4% concordance in lineage calls (using the  
177 same Pangolin and Viridian versions), and nucleotide call discordance of 0.59/1,000,000

178 sites. Further details of the validation and comparison processes are described in  
179 Supplementary Appendix B.

180

### 181 **Sample frame, sequencing, and upload**

182 Between July and August 2022, seven sequencing centres participated in a two-week  
183 sequencing pilot across seven countries: Senegal; Chile; South Africa; New South Wales  
184 (NSW), Australia; Vietnam; United Kingdom (UK); and Virginia, United States (USA).  
185 Centres were either accredited clinical microbiology or public health laboratories. All  
186 clinical samples in which SARS-CoV-2 was detected were eligible for inclusion and  
187 underwent in-house genomic sequencing at participating sites, with no more than one  
188 submission from an individual patient. Sequencing platform (either Illumina or ONT) and  
189 primer schemes were chosen by participating sites, who followed their established  
190 sequencing protocols.

191

192 Raw sequences were uploaded in FASTQ format to GPAS, the working name of the  
193 pipeline at the time, along with limited associated metadata (sample name, instrument  
194 platform, sample type [clinical or control], collection date, and country). Submitting sites  
195 verified the run quality reports of each sequencing batch including a review of positive  
196 and negative controls, and batches were passed or failed accordingly. All passed samples  
197 were tagged to release them to the shared data pool for subsequent aggregate analysis;  
198 explicit permission was given from all collaborators to configure data access controls  
199 such that all submitters could access and view each other's sequences, metadata, and  
200 analytical outputs. For this study, primer scheme information was not provided by the  
201 user, and automatic detection of primer scheme was enabled. All sequences were

202 uploaded to the European Nucleotide Archive (project accession: PRJEB70597) at the  
203 time of the study.

204

## 205 **Data analysis**

206 FASTQ files from the study were redownloaded from the ENA and run through EIT  
207 Pathogena (version 1.2.0 pre-release) on 6<sup>th</sup> November 2024. A maximum likelihood  
208 phylogeny of aligned sequences was constructed for the three largest Pango lineages in  
209 the sample set (BA.5, BA.4 and BA.2) using IQTree version 2.3.6, assuming a general time  
210 reversible nucleotide substitution model with gamma rate heterogeneity, and using the  
211 consensus tree from 1000 ultrafast bootstrapping [25]. All other analyses were  
212 conducted in RStudio version 2023.06.0+421.

## 213 **Results**

### 214 **Primer scheme detection**

215 5,432 sequences were shared across seven sites (Supplementary Table 1), with date of  
216 collection ranging from April to July 2022. Of submitted samples, 90 (1.7%) were controls  
217 and 5,342 (98.3%) were clinical samples. Primer schemes were successfully auto-  
218 detected for 4,238/5,432 (78.0%) of samples, but were incorrectly inferred for all  
219 1,194/5,432 (22.0%) samples from NSW, Australia which appropriately failed the  
220 Viridian quality control threshold for assembly. Further investigation showed that these  
221 samples were sequenced using a bespoke primer scheme that is not included in the  
222 current Viridian library, and these samples were excluded from further analysis.

223

### 224 **Aggregate analysis of global genetic epidemiology**

225 Among the clinical samples included in the analysis, 3,751/4,179 (89.8%) were  
226 assembled with at least 70% genome coverage (Table 1). 3,439/4,179 (82.3%) clinical  
227 samples were assembled with sufficient coverage and post-assembly quality to be  
228 assigned a lineage (Table 2). 3,412/3,439 (99.2%) were Omicron variants, with BA.5,  
229 BA.4 and BA.2 being the most common. A small number of Delta variant sequences were  
230 identified (0.4%, 15/3,439), all of which were collected prior to July 2022.

231

232

233

234

235

236

| Centre         | Submitted samples | Controls  | <50% coverage* | 50-70% coverage | >70% coverage | Earliest sample | Latest sample  |
|----------------|-------------------|-----------|----------------|-----------------|---------------|-----------------|----------------|
| Senegal        | 197               | 0         | 9              | 10              | 178           | 13th July 2022  | 20th July 2022 |
| Chile          | 1205              | 20        | 4              | 6               | 1175          | 16th June 2022  | 22nd July 2022 |
| South Africa   | 202               | 0         | 7              | 6               | 189           | 17th May 2022   | 24th June 2022 |
| Vietnam        | 316               | 3         | 14             | 7               | 292           | 1st April 2022  | 14th July 2022 |
| United Kingdom | 1818              | 36        | 280            | 85              | 1417          | 12th July 2022  | 26th July 2022 |
| Virginia, USA  | 500               | 0         | 0              | 0               | 500           | 7th June 2022   | 28th June 2022 |
| <b>Total</b>   | <b>4238</b>       | <b>59</b> | <b>314</b>     | <b>114</b>      | <b>3751</b>   |                 |                |

237

238 **Table 1: Samples submitted by study centre, with date of collection and genome coverage.** Earliest

239 and latest sample dates exclude controls.

240 \* includes samples that could not be assembled

| Centre         | Omicron  |            |            |                  |            |            |                | Delta                  | Alpha    | Other*    | Total        |
|----------------|----------|------------|------------|------------------|------------|------------|----------------|------------------------|----------|-----------|--------------|
|                | BA.1     | BA.2       | BA.4       | BA.5 and related |            |            |                | AY.5, AY.57, B.1.617.2 | B.1.1.7  |           |              |
|                |          |            |            | BA.5             | BE         | BF         | Other (BG, BK) |                        |          |           |              |
| Senegal        | 0        | 17         | 24         | 28               | 2          | 12         | 0              | 0                      | 0        | 0         | 83           |
| Chile          | 0        | 136        | 570        | 302              | 26         | 63         | 1              | 0                      | 0        | 5         | 1103         |
| South Africa   | 0        | 3          | 82         | 77               | 8          | 3          | 0              | 0                      | 0        | 3         | 176          |
| Vietnam        | 2        | 228        | 0          | 6                | 0          | 0          | 0              | 15                     | 0        | 0         | 251          |
| United Kingdom | 2        | 57         | 165        | 864              | 137        | 111        | 0              | 0                      | 1        | 2         | 1339         |
| Virginia, USA  | 0        | 289        | 89         | 84               | 12         | 9          | 3              | 0                      | 0        | 1         | 487          |
| <b>Total</b>   | <b>4</b> | <b>730</b> | <b>930</b> | <b>1361</b>      | <b>185</b> | <b>198</b> | <b>4</b>       | <b>15</b>              | <b>1</b> | <b>11</b> | <b>3,439</b> |

241

242 **Table 2: SARS-CoV-2 lineage of samples by study centre (where a lineage was assigned by Pangolin).**

243 \* Other includes: P.1, P.1.2, A, A.2.2, B.1, B.1.429, B.28, C.37, DE.1, XAM, XAN, XAS, XAZ, XBA, P.2

244

## 245 **Global mixing across multiple Omicron lineages**

246 For clinical samples collected between 1<sup>st</sup> June 2022 and 31<sup>st</sup> July 2022, the proportion

247 of samples assigned to the different Omicron sub-lineages varied substantially by study

248 site (Figure 1). Each of BA.2, BA.4 or BA.5 dominated (constituted >50% of samples from)

249 at least one site, while in Senegal no single lineage dominated, and BA.4 and BA.5 were  
250 equally common in South Africa (44.3% and 46.9% respectively).  
251

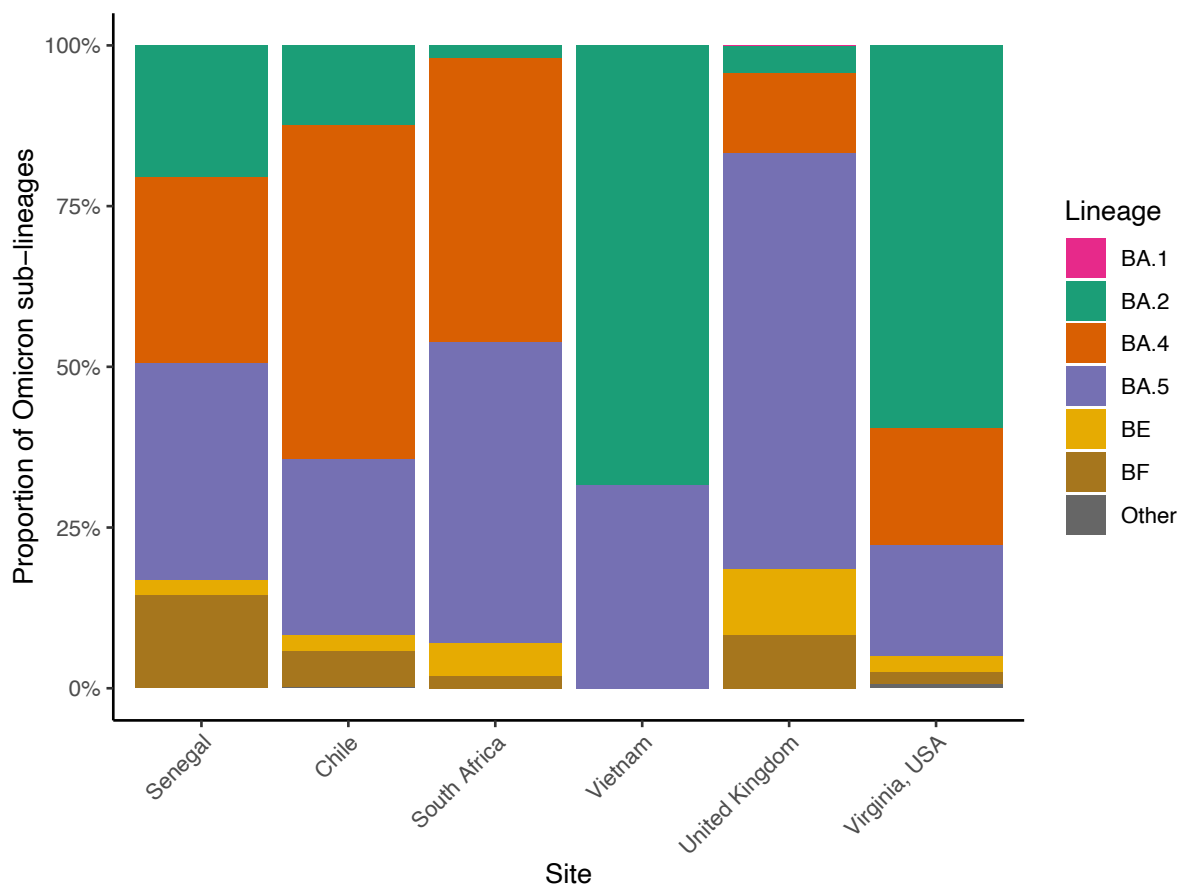

252

253

254 **Figure 1: Omicron sub-lineages by study site.** Proportion of samples assigned to Omicron sub-lineages  
255 within each study site, where collection date was in June or July 2022.

256

257 Maximum likelihood phylogenies for each of the three most common lineages revealed  
258 global mixing of Omicron lineages (Figure 2). There were no examples of sub-lineages  
259 being completely geographically restricted to one site; one sub-lineage of BA.4 was found  
260 predominantly in Chile, but an example of this sub-lineage was also identified in the  
261 United Kingdom.

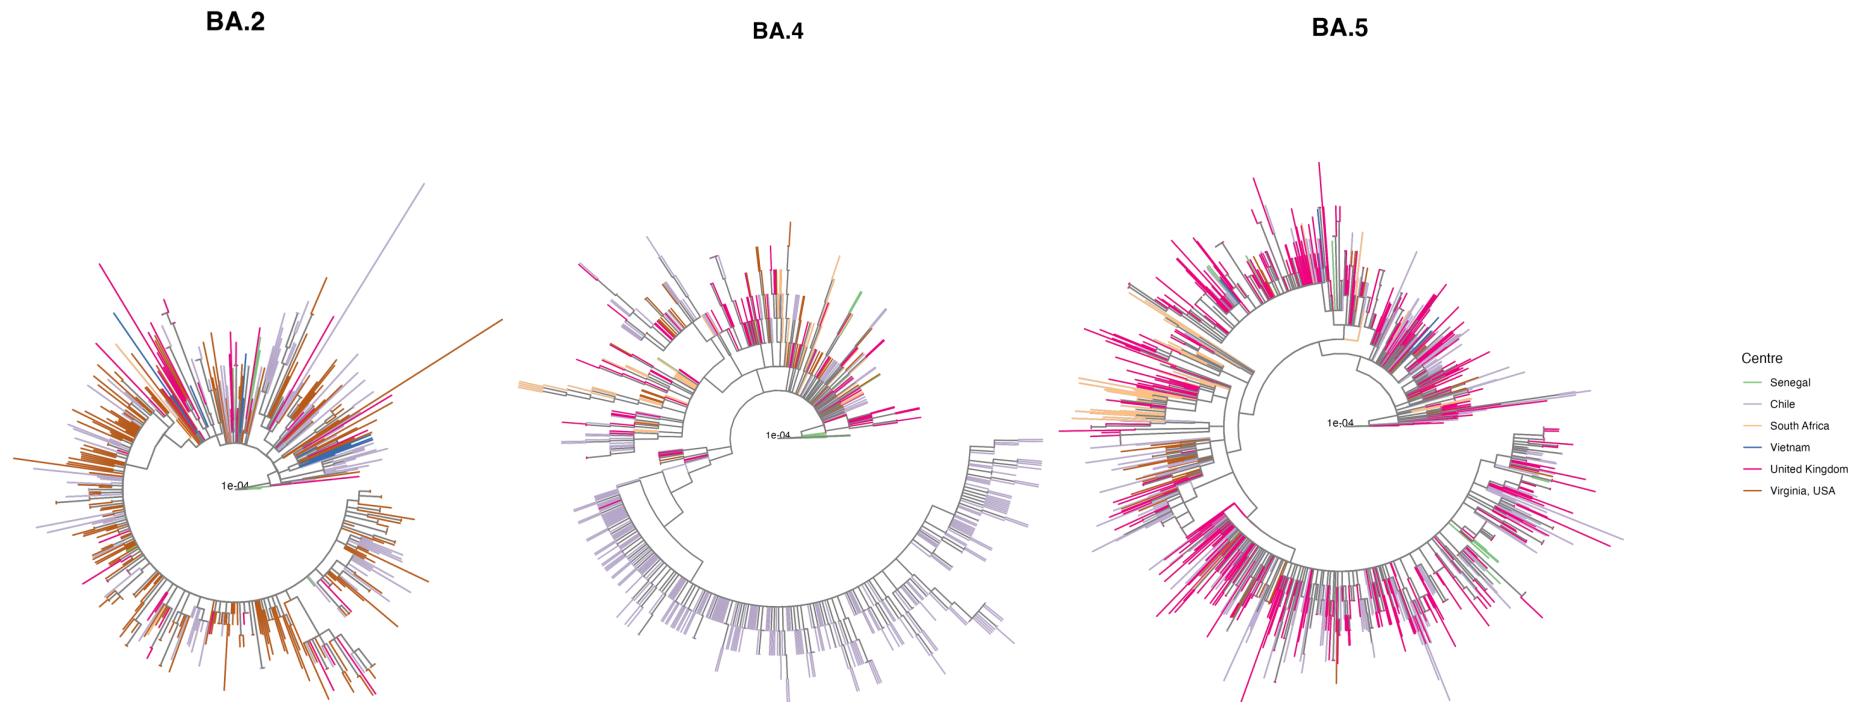

263

264 **Figure 2:** Maximum likelihood phylogeny of isolates from each major lineage (BA.2, BA.4, BA.5). Final branches are coloured according to the centre in which they

265 were sequenced.

266 For all three major lineages, there was evidence of genotypically identical (SNV = 0) and  
267 highly related (SNV  $\leq 3$ ) samples being found in different study sites, with increasing  
268 dispersal with higher SNV thresholds (Figure 3; Supplementary Table 2). The greatest  
269 dispersal was seen in the BA.4 lineage: of 358 samples with another genotypically  
270 identical sample, only 69.6% (249/358) were from the same site, with the rest  
271 distributed across the remaining sites. In addition, only 10.3% (96/930) of BA.4 and  
272 12.7% (173/1,361) of BA.5 samples did not have any related samples (SNV  $\leq 3$ ) in the  
273 shared pool, in contrast to BA.2 samples where 51.8% (378/730) samples had a related  
274 sample in the shared pool.

275

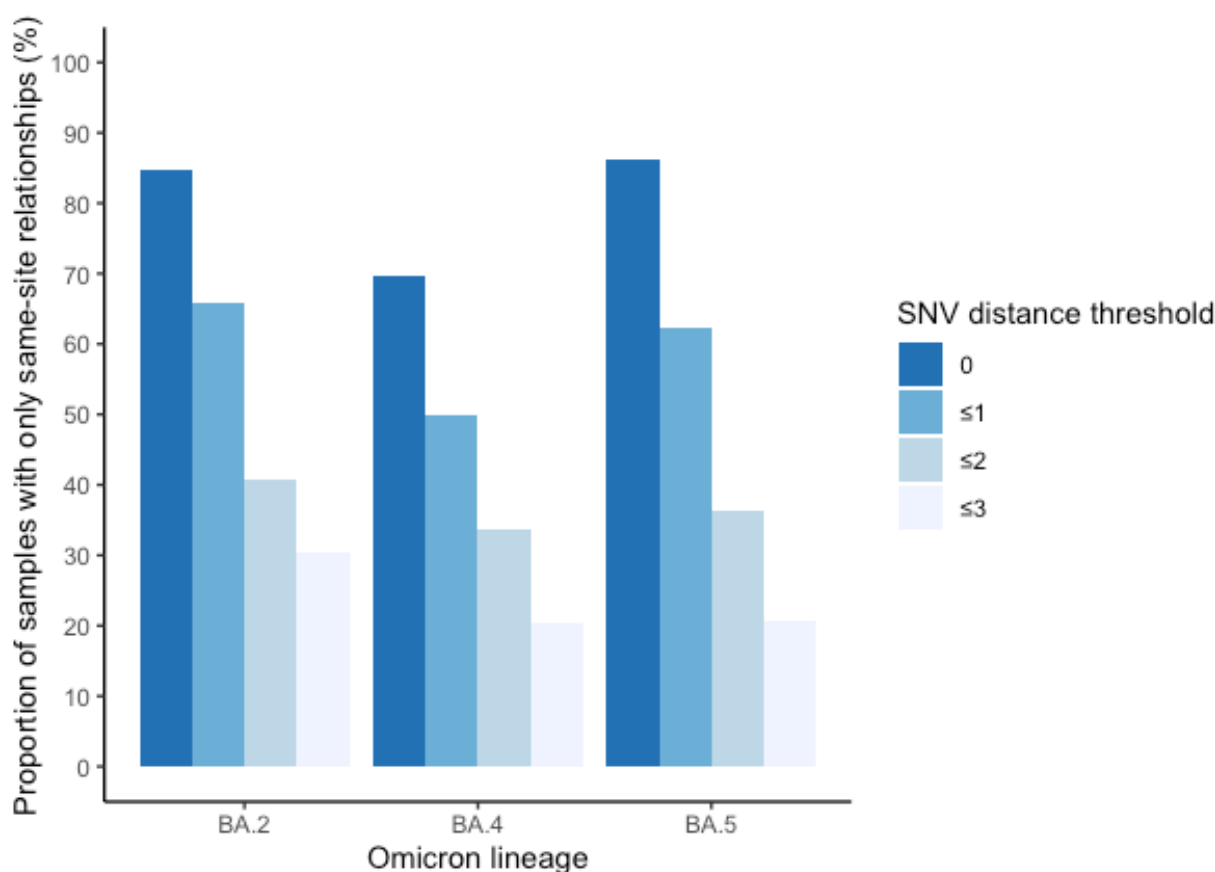

276

277 **Figure 3:** Percentage of unique samples for which all related samples were found only at the same site, at  
278 each genotypic relatedness (SNV) threshold.

279



## 280 **Cloud processing time and performance**

281 At the time of the study, cloud processing performance on GPAS was measured by time  
282 elapsed between upload and completion of analysis. Median cloud processing time per  
283 sample was 30.6 minutes (IQR: 13.1 – 69.9); variability was observed, with several  
284 batches from Australia, UK and USA taking longer than 1000 minutes (Supplementary  
285 Figure 1). These were caused by either a data centre outage during an extreme heat event  
286 in the UK, or as a result of a software update prematurely applied to the upload portal,  
287 which was promptly resolved by improvements in the client side CLI software. Other data  
288 upload issues were identified and addressed case-by-case, including metadata file  
289 formatting errors, the availability of upload clients compatible with all required  
290 operating systems, and user interface display errors preventing batch release.

291  
292 In TAP, median cloud processing time per sample for a typical batch of 100 was 14.5  
293 minutes (IQR: 13.8 – 15.0) for Illumina and 15.6 minutes (IQR: 15.2 – 16.7) for ONT; due  
294 to parallelisation, processing a single batch of 100 samples was achievable in 19.7  
295 minutes (Illumina) and 20.4 minutes (ONT) (Supplementary Figure 2). Processing all  
296 5,432 samples took 766 minutes (12.7 hours). CPU time per sample is approximately 3  
297 minutes (noting that this occurs in parallel, i.e. 2 CPUs working for 4 minutes would be  
298 reported as 8 minutes CPU time by the workflow manager, despite only taking 4  
299 minutes); majority of analysis time is associated with other pipeline activities including  
300 network file transfers or reading data from disk into memory. Peak RAM usage for typical  
301 use of the pipeline was approximately 5GB.

## 302 **Discussion**

303 This pilot study demonstrates the potential of globally synchronous data processing and  
304 analysis in informing public health, through a unified protocol of genome assembly,  
305 variant calling and relatedness analysis. The aggregated analysis from this study  
306 conforms to contemporary observations of SARS-CoV-2 genetic epidemiology at the time  
307 [26-28], and demonstrates cosmopolitan global mixing of Omicron lineages between  
308 study sites. Even a BA.4 sub-lineage found almost exclusively in Chile was not completely  
309 restricted to that site and could be identified in a geographically distant site (UK).  
310 Similarly, between 15.3% to 30.4% of genotypically identical (SNV=0) sequences were  
311 identified in different countries over the same two-month period. Such mixing of lineages  
312 likely reflects the relaxation of travel restrictions in the participating sites at the time of  
313 the study, and captures the rapid global dispersal of Omicron with successive selective  
314 sweeps of new lineages over short time scales [29]. These observations highlight the  
315 potential of a cloud-based sequencing pipeline in facilitating data sharing and generating  
316 co-ordinated insights that could inform real-time decision-making.

317

318 While automatic primer scheme detection was used for this study, our results show the  
319 limitation in this approach, with one centre using a custom scheme not contained in the  
320 current Viridian primer scheme library. With viral evolution, it is inevitable that new  
321 and/or modified primer schemes will continue to be developed to maintain sequencing  
322 coverage of an evolving target genome. Viridian has the capability to accommodate  
323 custom primer schemes when provided with a suitable scheme definition in browser  
324 extensible data (BED) format. This capability will form the basis of future pipeline  
325 iterations and will allow the pipeline to pivot in future to assemble other viruses beyond  
326 SARS-CoV-2 that use tiled amplicon sequencing. In turn, this ability to rapidly adapt

327 existing infrastructure for emerging threats, rather than build bespoke solutions from  
328 scratch each time, supports a proactive and ‘Always On’ approach to pandemic  
329 preparedness [30].

330

331 Our study is limited by the opportunistic sampling frame used and is likely to be  
332 geographically incomplete, with a preponderance for countries that have historically  
333 contributed more to global sequencing efforts. Similarly, our study has the limitation of  
334 lacking longitudinal data on how these findings changed over time. Despite these  
335 shortcomings, we have demonstrated how even a simply structured sampling across time  
336 and space is still well placed to rapidly identify replacement by new lineages. Such  
337 limitations in sampling frame diversity and global disparity in sequencing volume were  
338 reflected during the pandemic itself: sequencing efforts in high-income countries were  
339 up to ten-fold higher than that achieved in low- and middle-income countries during the  
340 first two years [11], and data was not collected evenly over the course of pandemic. Well  
341 designed, suitably powered, and representative sampling is a key part of pandemic  
342 preparedness planning, as exemplified by a cohort design in the UK [27].

343

344 The world is now better prepared to urgently initiate genomic pathogen surveillance. The  
345 available sequencing platform capacity is much improved, and the achievements of global  
346 data aggregation (as illustrated by INSDC, GISAID and Pathoplexus databases) have  
347 alleviated a major obstacle to effective genomic surveillance and data sharing. In turn, the  
348 integration of genomic data with disease manifestation and severity data would enable  
349 the ready investigation of associations between genomic variation and clinical outcome  
350 as suggested by others [31], and facilitate predictive modelling for anticipating the course  
351 of future epidemics [32].

352

353 A remaining obstacle, especially in low-resource settings, is establishing local turnkey  
354 bioinformatics to ensure standardised, quality-assured outputs that do not depend on in-  
355 house bioinformatics expertise. In TAP, we have developed an exemplar of such a cloud-  
356 based service, with simple ingestion of local sequence data and flexible privacy  
357 protections for data sharing to facilitate local or international comparative analyses.  
358 While factors such as internet bandwidth may limit real-world performance, TAP is  
359 capable of rapid parallel data processing, with a run time of 15 minutes per sample and  
360 20 minutes in total for a batch of 100 typical SARS-CoV-2 genomes. The EIT Pathogena  
361 platform ensures sustainability of technical and infrastructural support to the pipeline  
362 and is currently freely available to low- and middle-income countries, supporting long-  
363 term use across research, clinical, or surveillance settings. Such a service, in turn,  
364 contributes to the growing global landscape of genomic data sharing that will underpin  
365 future pandemic preparedness.

366

## 367 **Conclusions**

368 The COVID-19 pandemic has demonstrated the multiple ways in which viral sequencing  
369 can inform pandemic responses, but also the inequitable distribution of resources and  
370 capabilities. A service such as TAP contributes to the democratisation of genomics,  
371 enabling researchers and laboratories, regardless of their location or bioinformatics  
372 expertise, to participate actively in global surveillance efforts. By providing accessible  
373 and user-friendly tools for sequence assembly, lineage assignment, and data sharing, it  
374 promotes inclusive collaboration, harmonises data, and ultimately enhances pandemic  
375 preparedness.

376 **Author contributions**

377 Study conceptualisation: BCY, DWC

378 Study design: BCY, DWC

379 Software building and computational infrastructure: MB, BC, MH, ZI, PWF, JK, MLA, NS,  
380 JS, RT, JW

381 Data collection: DA, NTA, JB, CCR, ACR, PMC, MMD, AD, NTD, LD, LVD, JE, KF, MG, JG, SG,  
382 Hospital for Tropical Diseases SARS-CoV-2 testing team, NTTH, KJ, DK, TK, DNHM, AJM,  
383 NMN, SO, HP, MRH, VS, NTTa, LVT, PNT, NMT, NTT<sub>r</sub>, VDT, HRVD, AvG, NW

384 Data analysis: JT, BCY, BC, TEAP, PQ

385 Manuscript writing: JT, BCY, BC

386 Manuscript editing and review: all authors

387

388 **Funding statement**

389 GPAS is a non-profit organisation, and GPAS cloud infrastructure was supported by a  
390 donation from Oracle Corporation. For this study, all GPAS services were offered free of  
391 charge to all sites, and staff costs for the analysis team were met by the University of  
392 Oxford, with support from the National Institute for Health Research (NIHR) Oxford  
393 Biomedical Research Centre (BRC). TAP is deployed on the EIT Pathogena platform,  
394 funded by the Ellison Institute of Technology Oxford. EIT Pathogena is free at the point of  
395 use for users in low- and middle-income countries.

396

397 Sequencing activities for NICD are supported by a conditional grant from the South  
398 African National Department of Health as part of the emergency COVID-19 response; a  
399 cooperative agreement between the National Institute for Communicable Diseases of the  
400 National Health Laboratory Service and the United States Centers for Disease Control and

401 Prevention (NU51IP000930); the South African Medical Research Council (SAMRC) with  
402 funds received from the South African Department of Science and Innovation; the African  
403 Society of Laboratory Medicine (ASLM) and Africa Centers for Disease Control and  
404 Prevention through a sub-award from the Bill and Melinda Gates Foundation grant  
405 number INV-018978; Africa PGI, the UK Foreign, Commonwealth and Development Office  
406 and Wellcome (Grant no 221003/Z/20/Z); and the Department of Health and Social  
407 Care's Fleming Fund using UK aid. NICD sequencing was also supported by The  
408 Coronavirus Aid, Relief, and Economic Security Act (CARES ACT) through the Centers for  
409 Disease Control and Prevention (CDC) and the COVID International Task Force (ITF)  
410 funds through the CDC under the terms of a subcontract with the African Field  
411 Epidemiology Network (AFENET) AF-NICD-001/2021.

412  
413 Genomic surveillance conducted in Vietnam was supported by the Wellcome Trust  
414 (222574/Z/21/Z). L.V.T. is supported by the Wellcome Trust of Great Britain  
415 (204904/Z/16/Z and 226120/Z/22/Z).

416

#### 417 **Ethical statement**

418 SARS-CoV-2 sequencing was performed for public health surveillance and ethical  
419 approval for secondary analysis was not required. This determination was reviewed by  
420 the University of Oxford Joint Research Office. No patient identifying information was  
421 shared as part of this study. Sample identifiers remain with the submitter, and are never  
422 kept on GPAS/TAP, or shared with other users. GPAS/TAP generates identifiers for each  
423 sequence and writes a file linking anonymised ID to the submitted identifiers. Only the  
424 user submitting sequence data has access to these records. The GPAS/TAP upload client  
425 selects only SARS-CoV-2 sequence reads and discards all human sequences.

426

#### 427 **Data availability**

428 Submitted sequencing reads (free from human reads) for all included samples are  
429 available from European Nucleotide Archive study accession PRJEB70597.

430

#### 431 **Conflicts of interest**

432 AvG and NW have received grant funding from Sanofi and The Bill and Melinda Gates  
433 Foundation. PWF receives consultancy fees from the Ellison Institute of Technology,  
434 Oxford. JT, DWC and TEAP receive funding from the Ellison Institute of Technology,  
435 Oxford.

436

#### 437 **Acknowledgments**

- 438 • Microbial Genomics Reference Laboratory, New South Wales Health Pathology,  
439 Sydney, Australia
- 440 • El Instituto de Salud Pública de Chile, Chile
- 441 • Centre for Respiratory Diseases and Meningitis (CRDM), National Institute for  
442 Communicable Diseases (NICD), a division of the National Health Laboratory  
443 Service, South Africa
- 444 • The Institut Pasteur de Dakar, Senegal
- 445 • Oxford University Hospitals NHS Trust, Oxford, United Kingdom
- 446 • University of Virginia, Charlottesville, United States of America
- 447 • Oxford University Clinical Research Unit, Vietnam
- 448 • Hospital for Tropical Diseases SARS-CoV-2 testing team, HTD Vietnam: Le  
449 Manh Hung, Nguyen Le Nhu Tung, Nguyen Thanh Phong, Vo Minh Quang,  
450 Pham Thi Ngoc Thoa, Nguyen Thanh Truong, Tran Nguyen Phuong Thao,

451 Dao Phuong Linh, Ngo Tan Tai, Ho The Bao, Vo Trong Vuong, Huynh Thi

452 Kim Nhung

453 • Oracle Global Health Business Unit



## 454 **References**

- 455 1. Li J, Lai S, Gao GF, Shi W. The emergence, genomic diversity and global spread of SARS-CoV-2.  
456 Nature. 2021;600(7889):408-18.
- 457 2. Wilkinson E, Giovanetti M, Tegally H, San JE, Lessells R, Cuadros D, et al. A year of genomic  
458 surveillance reveals how the SARS-CoV-2 pandemic unfolded in Africa. Science. 2021;374(6566):423-31.
- 459 3. McCrone JT, Hill V, Bajaj S, Pena RE, Lambert BC, Inward R, et al. Context-specific emergence and  
460 growth of the SARS-CoV-2 Delta variant. Nature. 2022;610(7930):154-60.
- 461 4. Raghwani J, du Plessis L, McCrone JT, Hill SC, Parag KV, Theze J, et al. Genomic Epidemiology of  
462 Early SARS-CoV-2 Transmission Dynamics, Gujarat, India. Emerg Infect Dis. 2022;28(4):751-8.
- 463 5. Snell LB, Fisher CL, Taj U, Stirrup O, Merrick B, Alcolea-Medina A, et al. Combined epidemiological  
464 and genomic analysis of nosocomial SARS-CoV-2 infection early in the pandemic and the role of  
465 unidentified cases in transmission. Clin Microbiol Infect. 2022;28(1):93-100.
- 466 6. Updated working definitions and primary actions for SARS-Cov-2 variants. WHO Technical  
467 Advisory Group on Virus Evolution; 2023.
- 468 7. Tao K, Tzou PL, Nouhin J, Gupta RK, de Oliveira T, Kosakovsky Pond SL, et al. The biological and  
469 clinical significance of emerging SARS-CoV-2 variants. Nat Rev Genet. 2021;22(12):757-73.
- 470 8. Tuekprakhon A, Nutalai R, Djokaite-Guraliuc A, Zhou D, Ginn HM, Selvaraj M, et al. Antibody  
471 escape of SARS-CoV-2 Omicron BA.4 and BA.5 from vaccine and BA.1 serum. Cell. 2022;185(14):2422-33  
472 e13.
- 473 9. Aggarwal A, Akerman A, Milogiannakis V, Silva MR, Walker G, Stella AO, et al. SARS-CoV-2  
474 Omicron BA.5: Evolving tropism and evasion of potent humoral responses and resistance to clinical  
475 immunotherapeutics relative to viral variants of concern. EBioMedicine. 2022;84:104270.
- 476 10. Merhi G, Koweyes J, Salloum T, Khoury CA, Haidar S, Tokajian S. SARS-CoV-2 genomic  
477 epidemiology: data and sequencing infrastructure. Future Microbiol. 2022;17:1001-7.
- 478 11. Brito AF, Semenova E, Dudas G, Hassler GW, Kalinich CC, Kraemer MUG, et al. Global disparities in  
479 SARS-CoV-2 genomic surveillance. Nat Commun. 2022;13(1):7003.

- 480 12. Carter LL, Yu MA, Sacks JA, Barnadas C, Pereyaslov D, Cognat S, et al. Global genomic surveillance  
481 strategy for pathogens with pandemic and epidemic potential 2022-2032. *Bull World Health Organ.*  
482 2022;100(4):239-A.
- 483 13. Inzaule SC, Tessema SK, Kebede Y, Oghwell Ouma AE, Nkengasong JN. Genomic-informed pathogen  
484 surveillance in Africa: opportunities and challenges. *Lancet Infect Dis.* 2021;21(9):e281-e9.
- 485 14. Chen Z, Azman AS, Chen X, Zou J, Tian Y, Sun R, et al. Global landscape of SARS-CoV-2 genomic  
486 surveillance and data sharing. *Nat Genet.* 2022;54(4):499-507.
- 487 15. Ohlsen EC, Hawksworth AW, Wong K, Guagliardo SAJ, Fuller JA, Sloan ML, et al. Determining Gaps  
488 in Publicly Shared SARS-CoV-2 Genomic Surveillance Data by Analysis of Global Submissions. *Emerg*  
489 *Infect Dis.* 2022;28(13):S85-S92.
- 490 16. EIT Pathogena [Available from: <https://eit-pathogena.com>.
- 491 17. Constantinides B, Hunt M, Crook DW. Hostile: accurate decontamination of microbial host  
492 sequences. *Bioinformatics.* 2023;39(12).
- 493 18. Hunt M, Hinrichs AS, Anderson D, Karim L, Dearlove BL, Knaggs J, et al. Addressing pandemic-  
494 wide systematic errors in the SARS-CoV-2 phylogeny. *bioRxiv.* 2024:2024.04.29.591666.
- 495 19. Wu F, Zhao S, Yu B, Chen YM, Wang W, Song ZG, et al. A new coronavirus associated with human  
496 respiratory disease in China. *Nature.* 2020;579(7798):265-9.
- 497 20. Aksamentov I, Roemer C, Hodcroft EB, Neher RB. Nextclade: clade assignment, mutation calling  
498 and quality control for viral genomes. *Journal of Open Source Software.* 2021;6(67):3773.
- 499 21. O'Toole A, Scher E, Underwood A, Jackson B, Hill V, McCrone JT, et al. Assignment of  
500 epidemiological lineages in an emerging pandemic using the pangolin tool. *Virus Evol.*  
501 2021;7(2):veab064.
- 502 22. Mazariegos-Canellas O, Do T, Peto T, Eyre DW, Underwood A, Crook D, et al. BugMat and  
503 FindNeighbour: command line and server applications for investigating bacterial relatedness. *BMC*  
504 *Bioinformatics.* 2017;18(1):477.
- 505 23. FindNeighbour5 [Available from: <https://github.com/oxfordmmm/FN5>.

- 506 24. Constantinides B, Webster H, Rodger G, Hunt M, Supasa P, Dejnirattisai W, et al. A diverse  
507 reference set of cultured SARS-CoV-2 genomes sequenced using various amplification methods and  
508 instrument platforms 2024 [Available from: <https://www.ebi.ac.uk/biostudies/studies/S-BSST1334>.
- 509 25. Minh BQ, Schmidt HA, Chernomor O, Schrempf D, Woodhams MD, von Haeseler A, et al. IQ-TREE  
510 2: New Models and Efficient Methods for Phylogenetic Inference in the Genomic Era. *Mol Biol Evol.*  
511 2020;37(5):1530-4.
- 512 26. Tosta S, Moreno K, Schuab G, Fonseca V, Segovia FMC, Kashima S, et al. Global SARS-CoV-2  
513 genomic surveillance: What we have learned (so far). *Infect Genet Evol.* 2023;108:105405.
- 514 27. Foulkes S, Monk EJM, Sparkes D, Hettiarachchi N, Milligan ID, Munro K, et al. Early Warning  
515 Surveillance for SARS-CoV-2 Omicron Variants, United Kingdom, November 2021-September 2022.  
516 *Emerg Infect Dis.* 2023;29(1):184-8.
- 517 28. Xu Y, Liu T, Li Y, Wei X, Wang Z, Fang M, et al. Transmission of SARS-CoV-2 Omicron Variant  
518 under a Dynamic Clearance Strategy in Shandong, China. *Microbiol Spectr.* 2023;11(2):e0463222.
- 519 29. Markov PV, Ghafari M, Beer M, Lythgoe K, Simmonds P, Stilianakis NI, et al. The evolution of  
520 SARS-CoV-2. *Nat Rev Microbiol.* 2023;21(6):361-79.
- 521 30. van der Westhuizen HM, Soundararajan S, Berry T, Agus D, Carmona S, Ma P, et al. A consensus  
522 statement on dual purpose pathogen surveillance systems: The always on approach. *PLOS Glob Public*  
523 *Health.* 2024;4(11):e0003762.
- 524 31. Oude Munnink BB, Worp N, Nieuwenhuijse DF, Sikkema RS, Haagmans B, Fouchier RAM, et al.  
525 The next phase of SARS-CoV-2 surveillance: real-time molecular epidemiology. *Nat Med.*  
526 2021;27(9):1518-24.
- 527 32. Volz E, Mishra S, Chand M, Barrett JC, Johnson R, Geidelberg L, et al. Assessing transmissibility of  
528 SARS-CoV-2 lineage B.1.1.7 in England. *Nature.* 2021;593(7858):266-9.  
529
